# Supplementary material for: Measurement report: In-depth characterization of ship emissions during operations in a Mediterranean port
Source: Copernicus journal article supplement (doi:10.5194/egusphere-2024-2903), 2024-09-25
Supplement: Supplementary file [file egusphere-2024-2903-AC1-supplement.pdf]

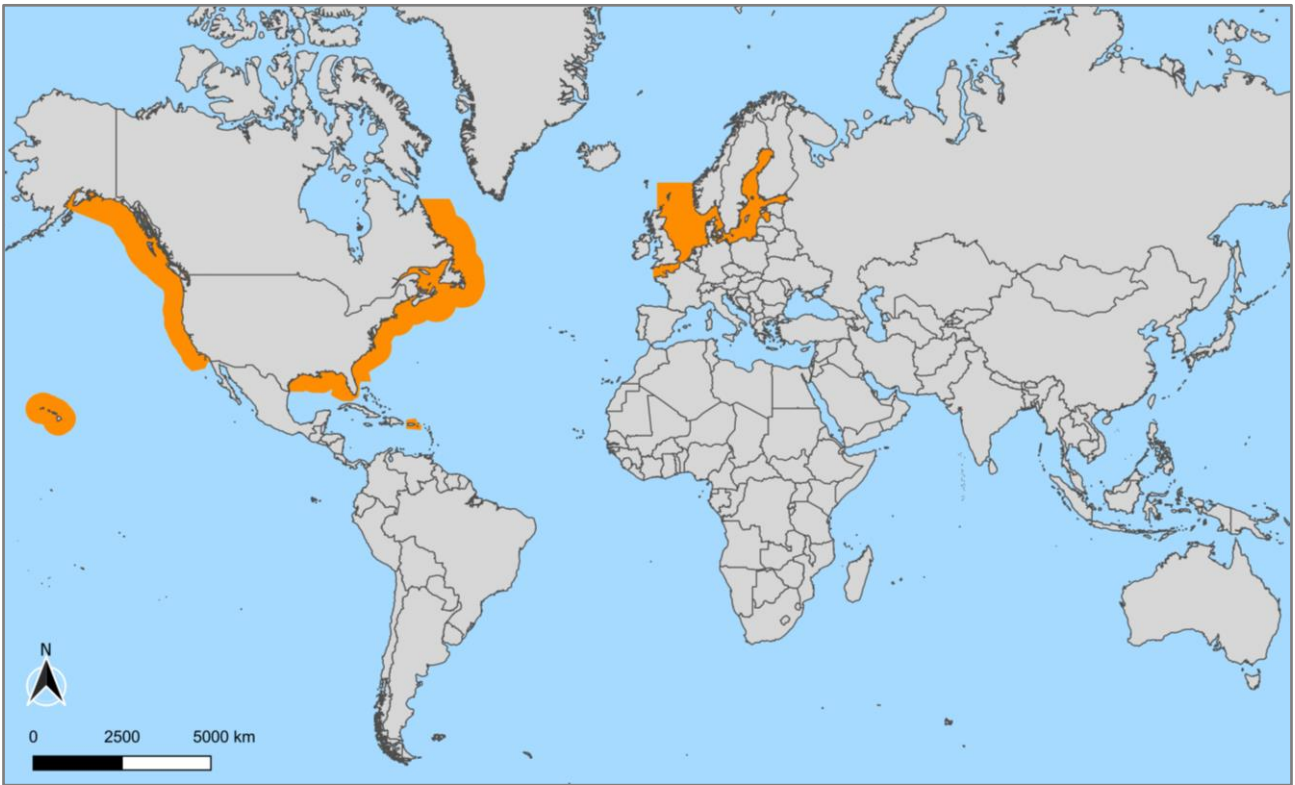

**Figure A1. Map of current Emission Control Areas (ECAs) (filled orange area), including The North American area, The Baltic Sea area, the Baltic Sea, The North Sea area and The Unites States Caribbean (IMO, 2021).**
